# Supplementary material
Source: PubMed Central journal article supplement (PMC6643620)
Supplement: ao7b01247_si_001.pdf [file ao7b01247_si_001.pdf]

## Supporting information

### Synthesis and Characterization of Thermoresponsive Hydrogels Based on N-Isopropylacrylamide Crosslinked with 4,4'-Dihydroxybiphenyl Diacrylate

Shuo Tang<sup>†,‡</sup>, Martha Floy<sup>†</sup>, Rohit Bhandari<sup>†,‡</sup>, Manjula Sunkara<sup>§,‡</sup>, Andrew J. Morris<sup>§,‡</sup>, Thomas D. Dziubla<sup>†,‡</sup>, J. Zach Hilt<sup>\*,†,‡</sup>

<sup>†</sup>*Department of Chemical and Materials Engineering, University of Kentucky, 177 F. Paul Anderson Tower, Lexington, Kentucky 40506, United States*

<sup>‡</sup>*Department of Chemical Engineering, Kansas State University, 1005 Durland Hall 1701A Platt Street, Manhattan, Kansas 66506, United States*

<sup>§</sup>*Department of Pharmacology and Nutritional Science, University of Kentucky, UK Medical Center MN 150, Lexington, Kentucky 40536, United States*

<sup>‡</sup>*Superfund Research Center, University of Kentucky, UK Medical Center MN 150, Lexington, Kentucky 40536, USA*

#### ABSTRACT:

A novel crosslinker [4,4'-dihydroxybiphenyl diacrylate (44BDA)] was developed, and a series of temperature responsive hydrogels were synthesized through free radical polymerization of N-isopropylacrylamide (NIPAAm) with 44BDA. The temperature responsive behavior of the resulting gels was characterized by swelling studies, and the lower critical solution temperature (LCST) of the hydrogels was characterized through differential scanning calorimetry (DSC). Increased content of 44BDA led to a decreased swelling ratio and shifted the LCST to lower temperatures. These novel hydrogels also displayed resiliency through multiple swelling-deswelling cycles, with their temperature responsiveness being reversible. The successful synthesis of NIPAAm-based hydrogels crosslinked with 44BDA has led to a new class of temperature responsive hydrogel system with a variety of potential applications.

**Keywords:** Temperature responsive, hydrogel, crosslinking density, LCST, NIPAAm

## Supporting Information Paragraph

- Supporting information shows the LC-TOF spectrum of a 4,4'-dihydroxybiphenyl partial acrylation study
- TEA:AC:4,4'-dihydroxybiphenyl was 2:2:1 instead of 3:3:1 in the full acrylation synthesis

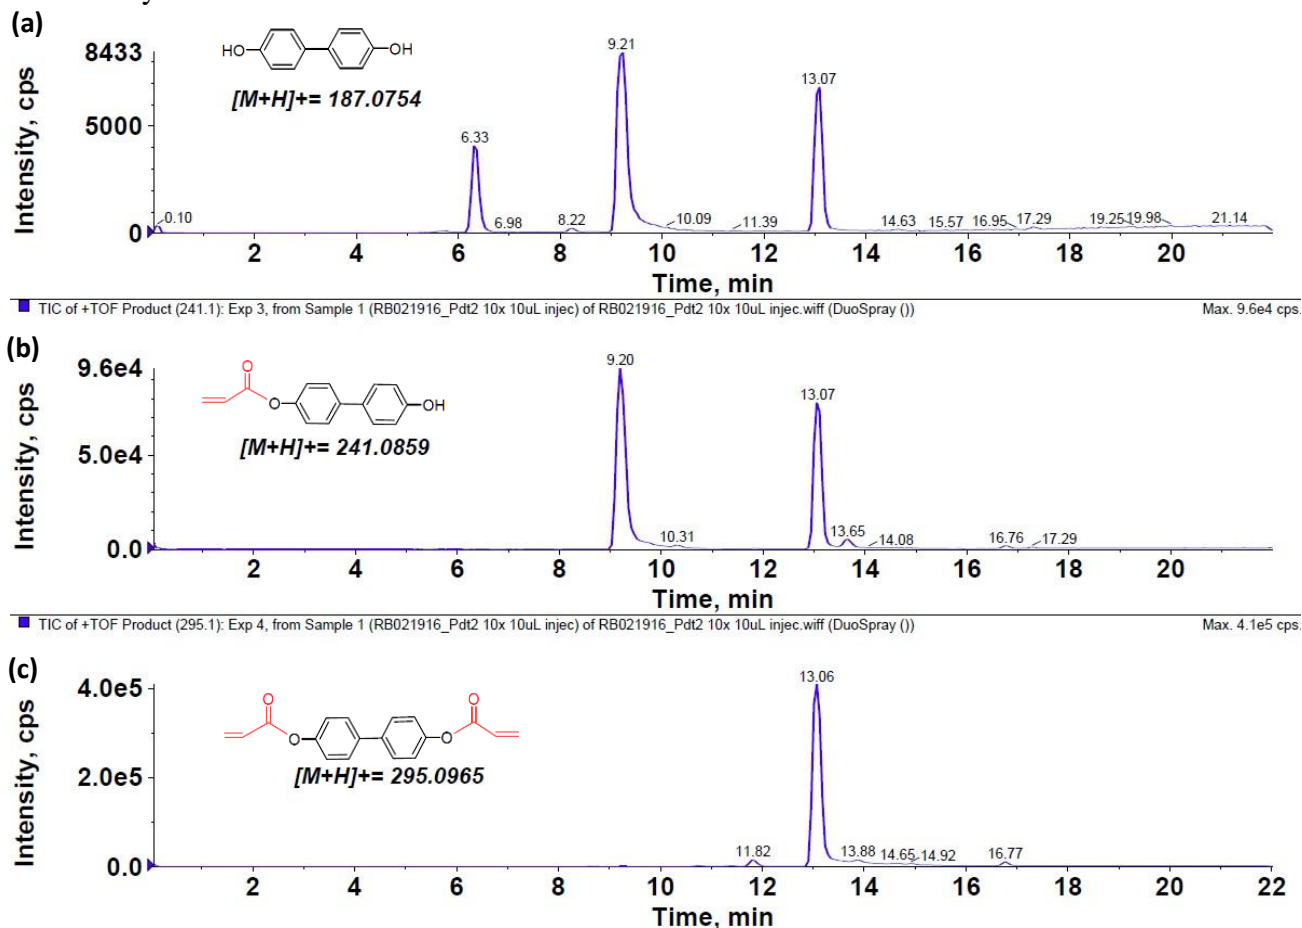

**Figure S1.** LC-TOF spectroscopy of 44BMA partial acrylation (a) 4,4'-dihydroxybiphenyl (b) monoacrylate and (c) diacrylate. The figure shows extracted ion chromatograms for the indicated species. 4,4'-dihydroxybiphenyl and its monoacrylate and diacrylate reaction products are separable by reverse phase HPLC with retention times of ~6, 9, and 13 minutes, respectively. Detection of the lower mass species at retention times corresponding to the monoacrylate and diacrylate species is presumably due to ion source fragmentation of the parent ions.
